# Supplementary material for: A terbium rich orthoborate LiSrTb2(BO3)3 and its analogues
Source: Royal Society of Chemistry journal article supplement (doi:10.1039/c5nj01913c), 2015-01-01
Supplement: c5nj01913c1.pdf [file c5nj01913c1.pdf]

Title: **A Terbium Rich Orthoborate  $\text{LiSrTb}_2(\text{BO}_3)_3$  and its analogues**

Journal: *New Journal of Chemistry*

Author: Pengyun Chen<sup>a,b</sup>, Mingjun Xia<sup>a</sup>, R. K. Li<sup>\*a</sup>

Affiliation:

<sup>a</sup> Beijing Center for Crystal Research and Development, Key Laboratory of Functional Crystals and Laser Technology, Technical Institute of Physics and Chemistry, Chinese Academy of Sciences, Beijing 100190, P. R. China.

<sup>b</sup> University of Chinese Academy of Sciences, Beijing 100049, P. R. China

Corresponding author: R. K. Li; rkli@mail.ipc.ac.cn

Tel: 86-10-82543711

### Supporting Information

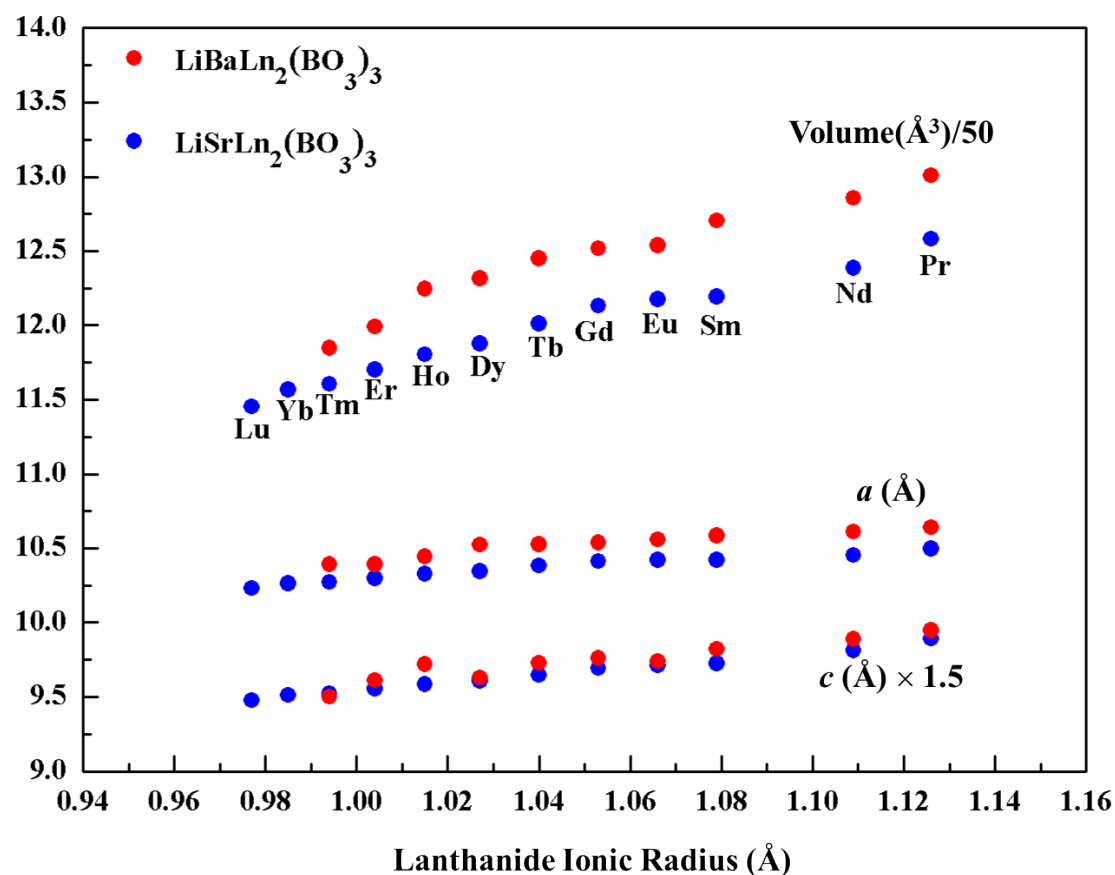

Figure S1. Plot of  $a$ ,  $c$  and unit-cell volume of  $\text{LiMLn}_2(\text{BO}_3)_3$  compounds versus  $\text{Ln}^{3+}$  ionic radius.
